# Supplementary material
Source: PubMed Central journal article supplement (PMC3719840)
Supplement: JVI.00878-13_zjv999097895so1.pdf [file JVI.00878-13_zjv999097895so1.pdf]

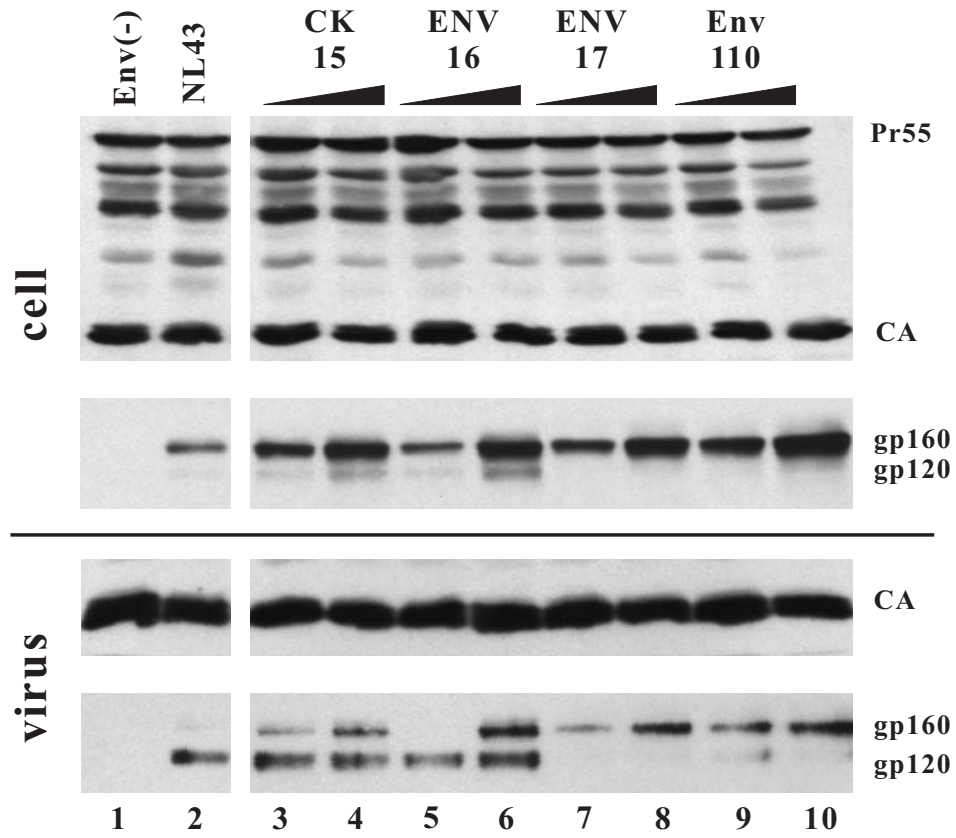

## Supplemental Figure Legend

Supplemental Figure 1. CK15 wild type and week 117 Class 1, 2, and 3 SHIV *env* gene variants are expressed intracellularly and packaged into HIV-1 pseudovirions. CMV vectors encoding increasing amounts (0.1  $\mu\text{g}$ : lanes 3, 5, 7, 9; 0.25  $\mu\text{g}$ : lanes 4, 6, 8, 10) of CK15 and the specified week 117 *env* genes indicated at the top, were co-transfected with an Env-defective pNL4-3 derivative; cells and virus-containing supernatants were harvested 24 h later. Pelleted virus and whole cell lysates were subjected to SDS-PAGE, transferred to PVDF membranes, and probed first with a rabbit polyclonal antibody to HIV-1 Env to detect gp160 and gp120 (2<sup>nd</sup> and 4<sup>th</sup> panel from top) followed by probing with a pooled serum from HIV-positive patients to identify Gag-specific proteins (panels 1 and 3 from top). Proteins were visualized by incubation with HRP-conjugated secondary antibodies followed by chemiluminescence.
